# Supplementary material for: Sobralia decora Bateman (Orchidaceae) and its relatives in South America
Source: PeerJ. 2024 Sep 26;12:e18078. doi: 10.7717/peerj.18078 (PMC11439386; doi:10.7717/peerj.18078)
Supplement: Material S1 [file peerj-12-18078-s001.xlsx]

## Sheet: Arkusz1
species	collectors	collection number	herbarium
Sobralia decora	Allen P.H.	31556	MO
Sobralia decora	Gentry A. & Renteria E.A.	23961	COL
Sobralia decora	Guarin I.O.	51	COL
Sobralia decora	Linden J.J.	3	W
Sobralia decora	Lozano G., Rangel O. & Estudiantes Postgrado	5724	COL
Sobralia decora	Mori S., Gracie C., Betros H., Hecht S., Hecht J. van Etten M. & Wright F.	21226	K
Sobralia decora	Cortes R. & Rodriguez J.	547	COL
Sobralia decora	Cortes R. & Rodriguez J.	572	COL
Sobralia decora	Cortes R. & Rodriguez J.	596	COL
Sobralia decora	Cortes R. & Rodriguez J.	772	COL
Sobralia decora	Linden J.J.	2	W
Sobralia decora	Skinner G.	s.n.	K
Sobralia fenzliana	Croat T.B.	73788	MO
Sobralia fenzliana	Croat T.B., Hannon L., Walhert G. & Katan Jua T.	91129	MO
Sobralia fenzliana	Dodson C.H. & P.M.	15665	AMES, K, MO
Sobralia fenzliana	Grubb P.J., Lloyd J.R., Pennington T.D. & Whitmore T.C.	1501	AMES, K
Sobralia fenzliana	Linder Suin & Grupo Post-Grado MO-QCNE	487	MO
Sobralia fenzliana	Nunez T., Sandoval S. &Machuca J.	379	MO
Sobralia fenzliana	Zarucchi J.L.	2140	COL, K, MO
Sobralia fenzliana	Allen P.H.	3156	COL
Sobralia fenzliana	Barbosa C., Cortes R., Palacios P., Rangel O.	8109	COL
Sobralia fenzliana	Palacios P., Barbosa C., Cortes R., Rangel O.	2880	COL
Sobralia fenzliana	Warszewicz J.	48	W, AMES - illustration
Sobralia lowii	Low H. & Co.	s.n.	K
Sobralia neglecta (synonym of S. decora)	Brenes A.M.	279	AMES, CR, F
Sobralia sessilis	Barrier S.	213	P
Sobralia sessilis	Barrier S.	221	P
Sobralia sessilis	Conceicao A.A. et al.	2336	K
Sobralia sessilis	de La Sota E.	20467	K
Sobralia sessilis	Froes R.	12555/24	AMES
Sobralia sessilis	Harley et al.	19238	K
Sobralia sessilis	Harley et al.	19239	K
Sobralia sessilis	Hoffman B. with Capellaro C. & Benjamin T.	671	US
Sobralia sessilis	Idrobo J.M. & Schulters R.E.	1326	AMES, COL, US
Sobralia sessilis	de Granville J.J., Crozier C. & Sarthou C.	15193	P
Sobralia sessilis	Jansen-Jacobs M.J., ter Welle B.J.H., Haripersaud P.P., Muller O. & van der Zee M.	2000	U
Sobralia sessilis	Jansen-Jacobs M.J., ter Welle B.J.H., Haripersaud P.P., Muller O. & ven der Zee M.	5791	B, MO, P, US
Sobralia sessilis	Maguire B., Schultz J.P., Soderstrom T.D. & Holmgren N.	54143	U
Sobralia sessilis	Maguire B., Schultz J.P., Soderstrom T.D. & Holmgren N.	53906	U
Sobralia sessilis	Prance G.T., Steward J.R., Ramos J.F. & Farias L.G.	9803	K, US
Sobralia sessilis	Rose J.N. & Rose G.	23947	US
Sobralia sessilis	Schulters R.E. & Cabrera I.	14321	AMES, MO
Sobralia sessilis	Schulters R.E. & Cabrera I.	19841	AMES, US
Sobralia sessilis	Schultz J.P.	10017	K, U
Sobralia sessilis	Steyermark J.A.	89426	AMES
Sobralia sessilis	Steyermark J.A.	87479	AMES
Sobralia sessilis	Steyermark J.A.	90280	US
Sobralia sessilis	Steyermark J.A., Dunsterville G.C.K. & E.	105763	AMES
Sobralia sessilis	Teunissen M.P.	1064	U
Sobralia sessilis	Westra L.Y.T	1018	U
Sobralia sessilis	Cardenas D., Castano N., Zuluaga A. & Sedano J.	21801	COAH
Sobralia sessilis	Cardenas D., Castano N., Zuluaga A., Rodriguez H. & Lucena A.	21727	COAH
Sobralia sessilis	Cardenas D., Chols O. & Lopez A.	29857	COAH
Sobralia sessilis	Rivera D., Cardenas D., Lopez R., Ramirez J.G. & Polanco P.	1214	COAH
Sobralia sessilis	Schomburgk R.	s.n.	K-L
Sobralia sessilis	Steyermark J.A.	89426	AMES
Sobralia sessilis (type of S. panamensis var. albiflos)	Powell C.W.	31	AMES, K
Sobralia sessilis (type of S. panamensis)	Powell C.W.	21	AMES, K, MO
Sobralia yauaperyensis	de Granville J.J.	204	MO, P
Sobralia yauaperyensis	de Granville J.J.	1864	MO, P
Sobralia yauaperyensis	Freiberg M.	129	B
Sobralia yauaperyensis	Mori S.A, & Pennington T.D.	17932	MO, NY, P
Sobralia yauaperyensis	Pignal M.M.	315	P
