# Supplementary material for: Sobralia decora Bateman (Orchidaceae) and its relatives in South America
Source: PeerJ. 2024 Sep 26;12:e18078. doi: 10.7717/peerj.18078 (PMC11439386; doi:10.7717/peerj.18078)
Supplement: Material S2 — The data were used for the analysis of the distribution, habitat and ecology of the discussed taxa. [file peerj-12-18078-s002.xls]

## Sheet: Arkusz1
species	country	collectors	collection number	date	herbarium	province/district	localization	coordinates	Alt (m.)	habitat	ecology
Sobralia decora	Brazil	Mori S., Gracie C., Betros H., Hecht S., Hecht J. van Etten M. & Wright F.	21226	9 Jun 1990	K	Amazonas	Rio Negro near Ponto de Paagadodo, in the Parana de Anavilhanas	2°45'S, 60°55'W		Inundated forest along river	epiphyte
Sobralia decora	Colombia	Guarin I.O.	51	20 Jan 1980	COL	Valle del Cauca	Queremal
Sobralia decora	Colombia	Gentry A. & Renteria E. A.	23961	10 Jan 1979	COL	Choco	Vicinity of Jequedo, 42 km W of Quibdo-Istmina Road on Pan American Highway under construction, 10 km of Rio Pato		220		terrestrial
Sobralia decora	Colombia	Allen P.H.	31556	10 Dec 1943	MO	Vaupes	Yapoboda
Sobralia decora	Colombia	Linden J.J.	3		W
Sobralia decora	Colombia	Lozano G., Rangel O. & Estudiantes Postgrado	5724	9 Sep 1987	COL	Cauca	Mpio de Guapi, Parque Nal. Natural Gorgona - Alto de los Micos
Sobralia decora	Guatemala	Skinner G.	s.n.		K
Sobralia decora	Colombia	Cortes R. & Rodriguez J.	547	24 Jul 1993	COL	Vaupés	Serrania de Traira. 10 km al NW del raudal de La Libertad	0°58’S, 69°45’W	250
Sobralia decora	Colombia	Cortes R. & Rodriguez J.	572	24 Jul 1993	COL	Vaupés	Serrania de Traira. 10 km al NW del raudal de La Libertad	0°58’S, 69°45’W	250
Sobralia decora	Colombia	Cortes R. & Rodriguez J.	596	24 Jul 1993	COL	Vaupés	Serrania de Traira. 10 km al NW del raudal de La Libertad	0°58’S, 69°45’W	250
Sobralia decora	Colombia	Cortes R. & Rodriguez J.	772	4 Aug 1993	COL	Vaupés	Serrania de Taraira, 20 km al NW del Raudal de la Libertad	0°53’S, 69°45’W	250
Sobralia decora	Colombia	Linden J.J.	2		W		Sine loc.
Sobralia fenzliana	Ecuador	Grubb P.J., Lloyd J.R., Pennington T.D. & Whitmore T.C.	1501	29 Aug 1960	AMES, K	Quito	Cerro Antisana, Shinguipino, between Rios Napo and Tena, 8 km SE of Tena	0°30'S, 78'W	450	rain forest	Epiphyte at 5 m
Sobralia fenzliana	Colombia	Zarucchi J.L.	2140	25 Sep 1976	COL, K, MO	Vaupes	Mitu and vicinity, lower Rio Kubiyu			at the edge of savanna in rocky, low tree forest	terrestrial to 1.5 m.
Sobralia fenzliana	Ecuador	Linder Suin & Grupo Post-Grado MO-QCNE	487	14 Dec 1999	MO	Manabi	Manta, Bosque Protector Chorillos	1°17'18"S, 80°37'05"W	590		epi
Sobralia fenzliana	Ecuador	Croat T.B., Hannon L., Walhert G. & Katan Jua T.	91129	16 Jul 2004	MO	Zamora-Chinchipe	Along road between Zumbi on Rio Zamora and summit of Cordillera del Condor beyond Paquisha, 10.1 km beyond Ro Nangaritza Bridge, 29.1 km E of Zumbi	3°56'13"S, 78°37'27"W	1352		terr
Sobralia fenzliana	Ecuador	Croat T.B.	73788	9 Apr 1992	MO	Cotopaxi	La Mana Canton, between Guayacan (13.1 km N of "Lan Mana") and Montenuevo (N of Pacayacu), at end of road which branches to the right 23.6 km from Guayacan, in vicinity of Escuela Quindigua, 10.7 km beyond the junction in road to Escuela Quindigua	0°39'S, 79°05'W	1480-1530	Along road	terr
Sobralia fenzliana	Ecuador	Nunez T., Sandoval S. &Machuca J.	379	11-12 Nov 1995	MO	Manabi	Montecristi, Cerro Montecristi. Carretera Manta-Jipijapa, entrada por Montecristo o El Chorrillo,	1°02'S, 80°41'W	300-600	Besque seco Pre-Montano, bosque secundario	epi
Sobralia fenzliana	Ecuador	Dodson C.H. & P.M.	15665	1985-03-08	AMES, K, MO	Pichincha	Km 68, Quito-Santo Domingo via nueva carretera por Tandapi		2000		terrestre
Sobralia fenzliana	Panama	Warszewicz J.	48		W, AMES - illustration
Sobralia fenzliana	Colombia	Palacios P., Barbosa C., Cortes R., Rangel O.	2880	29 Nov 1992	COL	Caquetá	Sierra de Chiribiquete. Bosque cerca de la cueva de las pinturas (levantamiento 21)
Sobralia fenzliana	Colombia	Barbosa C., Cortes R., Palacios P., Rangel O.	8109	29 Nov 1992	COL	Caquetá	Sierra de ChiribiqueteEn escarpes altos	1°4’19”N, 72°40’5”W,	810
Sobralia fenzliana	Colombia	Allen P.H.	3156	Dec 1943	COL	Vaupés	Alto Cuduyari, savanna Yapobodá
Sobralia lowii	Colombia	Low H. & Co.	s.n.		K	Cauca	New Grenada
Sobralia neglecta (synonym of S. decora)	Costa Rica	Brenes A.M.	279		AMES, CR, F
Sobralia sessilis	Suriname	Schultz J.P.	10017	2 Jul 1963	K, U					in shadow on trunk with hanging
Sobralia sessilis	Suriname	Westra L.Y.T	1018	6 Jun 1971	U	Para	Parariver near Wlegelegen
Sobralia sessilis	Suriname	Teunissen M.P.	1064	30 Jan 1972	U	Morowijne	Coermotibo, 2 km W od mouth of Wanekreek			in forest along creek
Sobralia sessilis	Brazil	Harley et al.	19238	2 Mar. 1977	K	Bahia	19.5 km SE of the town of Morro do Chapeu on the BAO52 road to Mundo Novo, by the Rio Ferro Doido	41°02'W, 11°38'S	900	open scrub to closed low woodland in the drier areas
Sobralia sessilis	Brazil	Harley et al.	19239	2 Mar. 1977	K	Bahia	19.5 km SE of the town of Morro do Chapeu on the BAO52 road to Mundo Novo, by the Rio Ferro Doido,	41°02'W, 11°38'S	900	open scrub to closed low woodland in the drier areas
Sobralia sessilis	Brazil	Prance G.T., Steward J.R., Ramos J.F. & Farias L.G.	9803	10 Feb 1969	K, US	Roraima	Vicinity of Auaris, upper slopes of Serra Parima, S. of Auaris	4°3'N, 64°22'W	1400-1520	rock outcrop
Sobralia sessilis	Brazil	Conceicao A.A. et al.	2336	13 Mar. 1996	K	Bahia	Mun. Morro do Chapeu, Proximo ao leito do rio Ferro-doido, na mata	11°37'41"S, 41°00'04"W	1000
Sobralia sessilis	Bolivia	de La Sota E.	20467	23 Sep 1963	K	La Paz	Coroico, Rio Yolosa		1400
Sobralia sessilis	Guyana	Jansen-Jacobs M.J., ter Welle B.J.H., Haripersaud P.P., Muller O. & ven der Zee M.	5791	5 Sep 1999	B, MO, P, US	Upper Essequibo	near Corona falls	3°10'N, 58°40'W	160	Forest on rock	epiphyte
Sobralia sessilis	French Guiana	J. J. de Granville, F. Crozier & C. Sarthou	15193	10 Jul 2002	P		Monts D'Arawa, Pied du versant sud-est de la grande savane-roche. Rive droite de la crique	2°49'00"N, 53°22'00"W	200	Foret basse d'inselberg
Sobralia sessilis	Peru	Barrier S.	213	27 Dec 1977	P	Loreto	Rio Fuvineto, affluent du Rio Putumayo. Rerritoire des indiens Secoya.			foret autour de l'abattis sur le bord du ruisseau. Partout chacra foret	epi
Sobralia sessilis	Colombia	Schulters R.E. & Cabrera I.	14321	4-6 Oct 1951	AMES, MO	Vaupes	Rio Kuduyari (affluent of Rio Vaupes), Yapoboda			quartzite savannah	terr
Sobralia sessilis	Venezuela	Steyermark J.A.	89426	22 Aug 1961	AMES	Bolivar	Sierra de Lema, Cabeceras of Rio Chicanan, 80 km en linea recta al. Suroeste de El Dorado	6°5'N, 62°W	700	wet forest on summit of low pass over summit of Sierra	epi
Sobralia sessilis	Venezuela	Steyermark J.A., Dunsterville G.C.K. & E.	105763	1972-03-31	AMES	Zulia	Sierra de Perija, Bosque entre la loma que conduce hacia el Pishikako y Pishikako siguiendo el Rio Vikay-kuna (afluente del Rio Tumuriasa), cerca de la frontera Colombo-Venezolana		1400	dry forest	ter
Sobralia sessilis	Venezuela	Steyermark J.A.	87479	12 Nov 1960	AMES	Delta Amacuro	inundated forest Rio Cuyubini, along lower section of river, upstream from Casa Cuyubini		90
Sobralia sessilis	Brazil	Froes R.	12555/24	5 May 1942	AMES	Amazonas	basin of Rio Negro, Rio Tikkie
Sobralia sessilis	Colombia	Schulters R.E. & Cabrera I.	19841	Jan 1952	AMES, US	Amazonas-Vaupes	Rio Apaporis: Sorotama (above mouth of Rio Kananari) and vicinity	0°5'N, 70°40'W	900'
Sobralia sessilis	Colombia	Idrobo J.M. & Schulters R.E.	1326	26 Jan 1951	AMES, COL, US	Meta	Sabanas de San Juan de Arama, margen izquierda del rio Guejar, alrededores del aterrizaje "Los Micos"		500
Sobralia sessilis	Guyana	Hoffman B. with Capellaro C. & Benjamin T.	671	17 Dec 1991	US		Barima-Waini Region, Upper Sebai River, tributory of Kaituma R. 8 km upriver from Sebai river.	7°51'N, 59°17'W	10	riparian vegetation merging into swamp forest	epi
Sobralia sessilis	Ecuador	Rose J.N. & Rose G.	23947	6-15 Oct 1918	US	El Oro	vicinity of Portovelo
Sobralia sessilis	Venezuela	Steyermark J.A.	90280	27 Dec 1961	US	Bolivar	Sierra Ichun: ladereas boscosas al. Norte del Salto Maria Espuma (Salto Ichun), a lo largo del rio Ichun (tributario del Rio Paragua)	4°46'N, 63°18'W	625-725		ter
Sobralia sessilis	Suriname	Maguire B., Schultz J.P., Soderstrom T.D. & Holmgren N.	53906	1 Jul 1963	U		Zuid River, vicinity Falls Camp, 2 km above confluence with Lucie River	3020'N, 56049'W-30010'N, 56029'W	220	about rapids and adjacent forest	terrestrial
Sobralia sessilis	Guyana	Jansen-Jacobs M.J., ter Welle B.J.H., Haripersaud P.P., Muller O. & van der Zee M.	2000	5 Sep 1999	U	Upper Essequibo	Rewa River, near Corona Falls	02010'N, 58040'W	160	forest on rock	epiphyte
Sobralia sessilis	Peru	Barrier S.	221	31 Dec 1977	P	Loreto	Rio Yuviento, affluent du Rio Putumayo. Terr. Des indiens Secoya. Village de San Martin sur le Yubineto en amont de Bellavista			foret	epi
Sobralia sessilis	Suriname	Maguire B., Schultz J.P., Soderstrom T.D. & Holmgren N.	54143	12 Jul 1963	U		Lusie River, 2 km below affluence of Oost River	3020'N, 56049'W-3032'N, 56026'W	225	riverine forest	epiphyte
Sobralia sessilis	Venezuela	Schomburgk R.	s.n.		K-L
Sobralia sessilis	Venezuela	Steyermark J.A.	89426	22 Aug 1961	AMES	Bolivar	Sierra de Lema, Cabeceras of Rio Chicanan, 80 km en linea recta al. Suroeste de El Dorado,	6°5'N, 62°W	700
Sobralia sessilis	Colombia	Cardenas D., Chols O. & Lopez A.	29857	5 Aug 2007	COAH	Guaviare	Mpio. San José del Guaviare. Serrania de la Lindosa, sector entre La Lindosa-Charco Indio-Pozos Naturales-La Rebecca	2°30’28”N 72°38’31”W
Sobralia sessilis	Colombia	Cardenas D., Castano N., Zuluaga A. & Sedano J.	21801	9 Sep 2008	COAH	Guaviare	Mpio. San José del Guaviare. Serrania de la Lindosa. Sector los Alpes	2°29’22.8”N 72°46’54.1”W	300-400
Sobralia sessilis	Colombia	Cardenas D., Castano N., Zuluaga A., Rodriguez H. & Lucena A.	21727	6 Sep 2008,	COAH	Guaviare	Mpio. San José del Guaviare. Serrania de la Lindosa. Cerros de la Fortaleza y Monserrate, sector SE de la serrania	2°27’49.3”N 72°37’8.3”W	300-400
Sobralia sessilis	Colombia	Rivera D., Cardenas D., Lopez R., Ramirez J.G. & Polanco P.	1214	4 Nov 2002	COAH	Vaupés	Mpio La Macarena. Vereda El Billar, afloramiento rocoso anexo al Cerro La Antena, margen izquierda del río Guayabero, aguas abajo	2°13’26.6”N 73°48’31.2”W	280-350
Sobralia sessilis (type of S. panamensis var. albiflos)	Panama	Powell C.W.	31		AMES, K
Sobralia sessilis (type of S. panamensis)	Panama	Powell C.W.	21		AMES, K, MO
Sobralia yauaperyensis	Guyana	de Granville J.J.	204	12 May 1969	MO, P		Crique Alaparoubo, affluent du fleuve Sinnamary, a 3 km
Sobralia yauaperyensis	Guyana	de Granville J.J.	1864	19 May 1973	MO, P		Riviere Petit Ouangi
Sobralia yauaperyensis	French Guiana	Freiberg M.	129	11 Sep 1986	B		Saul	3̊38’N, 53̊12’W
Sobralia yauaperyensis	French Guiana	Mori S.A, & Pennington T.D.	17932	8 May 1986	MO, NY, P		Saul, La Fumee Mt. La Fume West Trail	3̊37’N, 53̊12’W	200
Sobralia yauaperyensis	French Guiana	Pignal M.M.	315	9 Feb 1999	P		Site du Barrage de Petit Saut (recolte´ vivant AFCPO 01-1994), cultive´ au jardin botanique Cherbourg (CH601), Parc Emmanuel Liais
